# Supplementary material
Source: PubMed Central journal article supplement (PMC7016934)
Supplement: ao9b02741_si_001.pdf [file ao9b02741_si_001.pdf]

# Supporting Information

## **Pt-Ni@PC900 Hybrid derived from layered structure Cd-MOF for fuel cell ORR activity**

*Muhammad Nadeem<sup>a,b,d,†</sup>, Ghulam Yasin<sup>b,†</sup>, Muhammad Arif<sup>b</sup>, Moazzam H. Bhatti<sup>a,\*</sup>, Koray Sayin<sup>c</sup>, Mazhar Mehmood<sup>d</sup>, Uzma Yunus<sup>a</sup>, Shoaib Mehboob<sup>d</sup>, Imtiaz Ahmed<sup>a</sup> and Ulrich Flörke<sup>b</sup>*

<sup>a</sup> Department of Chemistry, Allama Iqbal Open University, Islamabad, Pakistan

<sup>b</sup> State Key Laboratory of Chemical Resource Engineering, Institute of Science, and College of Energy, Beijing University of Chemical Technology, Beijing 100029, P. R. China.

<sup>c</sup> *Department of Chemistry, Institute of Science, Cumhuriyet University 58140 Sivas – Turkey*

<sup>d</sup> *National Center for Nanotechnology, Department of Metallurgy and Materials Engineering, Pakistan Institute of Engineering and Applied Sciences (PIEAS), Nilore 45650, Islamabad, Pakistan*

<sup>e</sup> *Anorganische und Analytische Chemie, Fakultät für Naturwissenschaften, Universität Paderborn, Warburgerstrasse 100, D-33098 Paderborn, Germany*

E-mail of corresponding Author:

\* [moazzamhussain\\_b@yahoo.com](mailto:moazzamhussain_b@yahoo.com) (M.H. Bhatti).

†These authors contributed to this paper equally.

## Computational Method

The quantum chemical calculations of Cd-MOF are performed by Gaussian programs. [1, 2] The hybrid density functional theory was used by utilizing B3LYP with LANL2DZ basis set. [3, 4] The scaling factor of 0.961 was used for IR frequencies to calculate anharmonic frequencies. UV-VIS spectrum of related compound was calculated through TD-B3LYP/LANL2DZ level in gas phase, DMSO, ethanol and water. Conductor polarized continuum model (C-PCM) was used in calculation of solute-solvent interactions. Additionally, some quantum chemical parameters which are static dipole moment ( $\mu$ ), average linear polarizability ( $\alpha$ ), anisotropic polarizability ( $\Delta\alpha$ ), the first hyperpolarizability ( $\beta$ ) and optical softness ( $\sigma_o$ ) were calculated via Eq. (1) – (5). [5, 6]

$$\mu = \sqrt{\mu_x^2 + \mu_y^2 + \mu_z^2} \quad (1)$$

$$\alpha = \frac{1}{3}(\alpha_{xx} + \alpha_{yy} + \alpha_{zz}) \quad (2)$$

$$\Delta\alpha = \frac{1}{\sqrt{2}}[(\alpha_{xx} - \alpha_{yy})^2 + (\alpha_{yy} - \alpha_{zz})^2 + (\alpha_{zz} - \alpha_{xx})^2 + 6\alpha_{xz}^2 + 6\alpha_{xy}^2 + 6\alpha_{yz}^2]^{1/2} \quad (3)$$

$$\beta = [(\beta_{xxx} + \beta_{xyy} + \beta_{xzz})^2 + (\beta_{yyy} + \beta_{yxx} + \beta_{yzz})^2 + (\beta_{zzz} + \beta_{zxx} + \beta_{zyy})^2]^{1/2} \quad (4)$$

$$\sigma_o = \frac{1}{E_{GAP}} \quad (5)$$

## General Characterization Techniques

The single crystal of the Cd-MOF was analysed by the Bruker SMART CCD area-detector diffractometer through intensity collection data. The measurements were carried out at temperature 130K by utilizing monochromated radiation of wavelength 7.1073 nm. The structure has been figured out after acquiring data from equivalent reflections (after the application of semi empirical absorption corrections) with SHELXLS-97 and the atomic model refined against  $|F|^2$ . [7] All atoms excluding hydrogen had been

elaborated an-isotropically. The isotropic displacement measurements like  $U_{\text{iso}}(\text{H}) = 1.2U_{\text{eq}}(\text{C/O})$  and C-H 0.95-0.98 Å have been utilized to find out hydrogen atoms riding on the parent atoms from difference Fourier maps. The Nicolet iS 10 FTIR Spectrophotometer (4000-400  $\text{cm}^{-1}$ ) was utilized for FTIR spectra (KBr-discs) of compounds i.e H<sub>2</sub>BDC and Cd-MOF. The UV-1800 Shimadzu spectrophotometer was used for UV-Vis spectra of compounds. The BET surface area and pore volume curves for Cd-MOF have been calculated through Autosorb iQ3 gas sorption analyzer by utilization of liquid nitrogen bath at 77K. The Cd-MOF was activated at 100 °C for 12 h under vacuum. The Femto Fiber Pro laser system from TOPTICA Photonics was employed for tera hertz measurements. The details of measurement can be found as reported by Nadeem et al. [8, 9]

### **Measurements for ORR**

ORR measurements were performed through Autolab PGSTAT302N (Metrohm) work station which was coupled with the rotating electrode. The measurement was performed by the electrolytic cell which comprises three electrodes present in 0.1 M KOH electrolyte i.e. Ag/AgCl as reference electrode, Pt wire as counter electrode, Rotating ring disk electrode (RRDE) and Rotating disk electrode (RDE) both these were used as working electrodes. The scan rate used for linear sweep voltammograms was 5  $\text{mVs}^{-1}$ . The onset potentials ( $E_{\text{onset}}$ ) were determined by taking the assumption that the potential at which the current density attains 1% of limiting current density. The halfwave potential is the potential measured where the current density becomes half of the limiting current density.

The ink of the Pt-Ni@PC900 and 20%Pt/C was prepared by dispersing 5mg of each compound separately in 1 ml H<sub>2</sub>O, then 25  $\mu\text{L}$  of 5%Nafion D-521 dispersion (Alfa Aesar) along with 250

$\mu\text{L}$  of isopropanol was added in the dispersion. The whole mixture was sonicated for 3 hours. The precise amount of ink (20  $\mu\text{L}$ ) was applied onto a glassy carbon of RRDE and RDE, allowed to dry in air, giving a catalyst loading of 316  $\mu\text{g cm}^{-2}$  for all samples. The  $\text{O}_2$  saturated electrolyte was prepared by purging  $\text{O}_2$  (99.999 %) into the electrolyte solution for 30 minutes. For comparison, CV measurements were also performed in an  $\text{N}_2$  (99.99%)-saturated electrolyte. For RDE measurements, the working electrode was scanned at a rate of 5  $\text{mVs}^{-1}$  at various rotation speeds (400, 625, 900, 1225, 1600 and 2025 rpm). The Koutecky-Levich equation is as under.

$$\frac{1}{J} = \frac{1}{J_K} + \frac{1}{J_d} = \frac{1}{J_K} + \frac{1}{A * \sqrt{\omega}}, A = 0.2nFC_0D^{2/3}\nu^{-1/6}$$

Where  
 $J$  = observed current density  
 $J_K$  = kinetic current density  
 $J_d$  = diffusion current density

The other parameters are  $\omega$  used for the rotation of electrode in rpm,  $F$  is denoted as Faraday constant (96485  $\text{C mol}^{-1}$ ),  $C_0$  is for bulk concentration of  $\text{O}_2$  ( $1.26 \times 10^{-6} \text{ molL}^{-1}$ ),  $D$  is the diffusion constant for oxygen in 0.1 **M** KOH ( $1.9 \times 10^{-5} \text{ cm}^2\text{s}^{-1}$ ) and  $\nu$  is the kinetic viscosity ( $0.01 \text{ cm}^2 \text{ s}^{-1}$ ). The coefficient 0.2 is used when the rotation speed is expressed in rpm.

The number of transferred electrons ( $n$ ) and  $J_k$  can be find out from slope and intercept of Koutecky–Levich plots, respectively. The value of total electron transfer ( $n$ ) and percentage of  $\text{HO}_2^{-1}$  production for RRDE can be calculated as follows.

$$n = \frac{4i_{disk}}{i_{disk} + \frac{i_{ring}}{N}}$$

$$\text{HO}_2^- \% = \frac{200i_{disk}}{N(i_{disk} + \frac{i_{ring}}{N})} \times 100$$

The potential difference between Pt ring and GCE disk was maintained 1.5V. The  $I_{\text{disk}}$  and  $I_{\text{ring}}$  are the values of the current for disk and ring respectively.  $N$  is the current collection efficiency, which was found to be 0.37.

The low energy gap between LUMO and HOMO provide the information about the reactivity of the complex molecule.

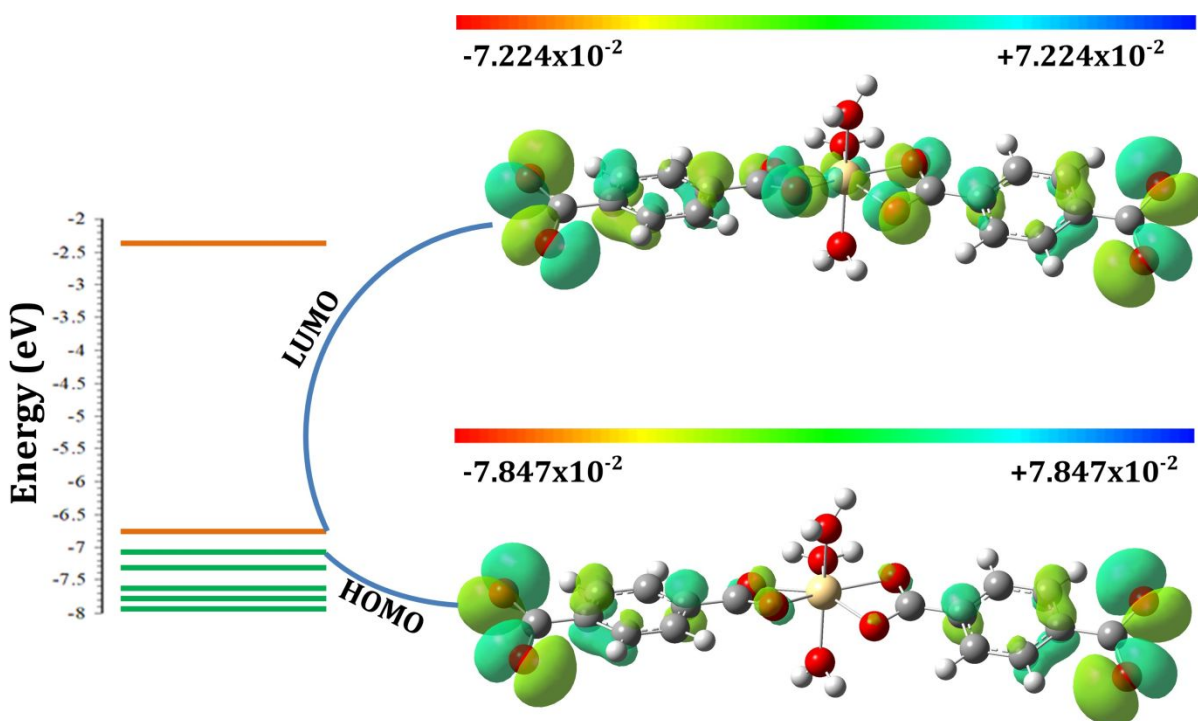

Figure S1. A section of molecular orbital energy diagram for Cd-MOF.

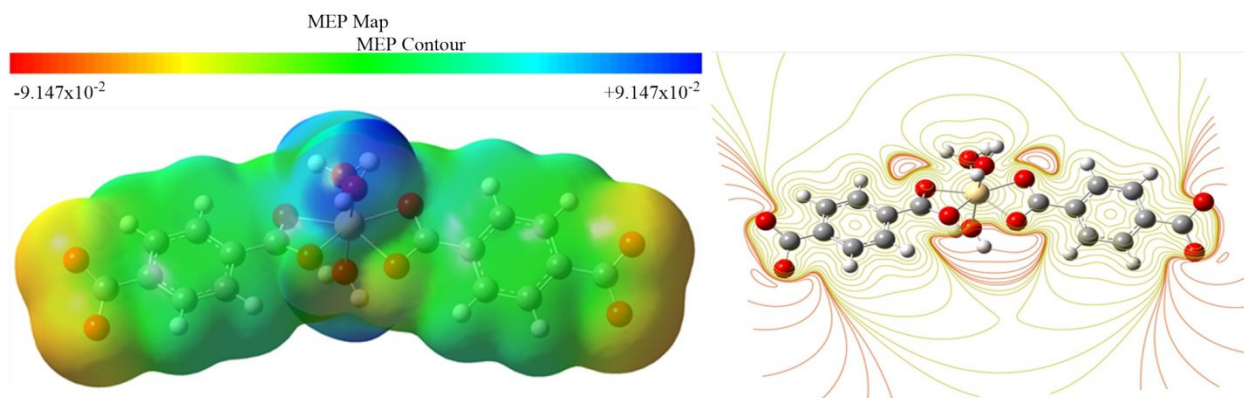

Figure S2. MEP map and contour diagram of molecular orbitals for Cd-MOF.

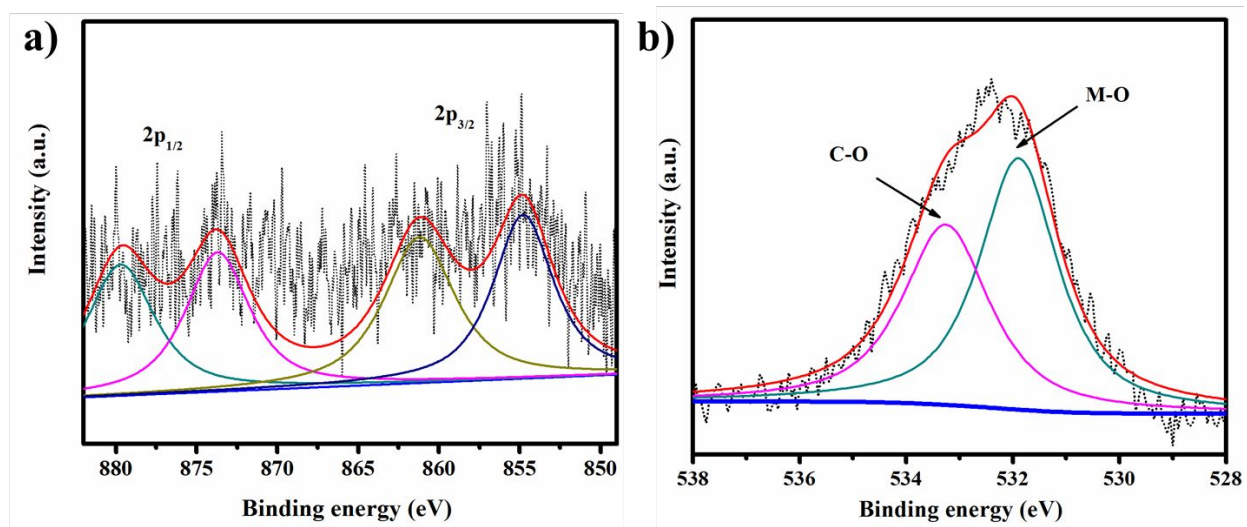

Figure S3. XPS spectra (a) Ni2p core line of Pt-Ni@PC900 and (b) O1s core line of Pt-Ni@PC900.

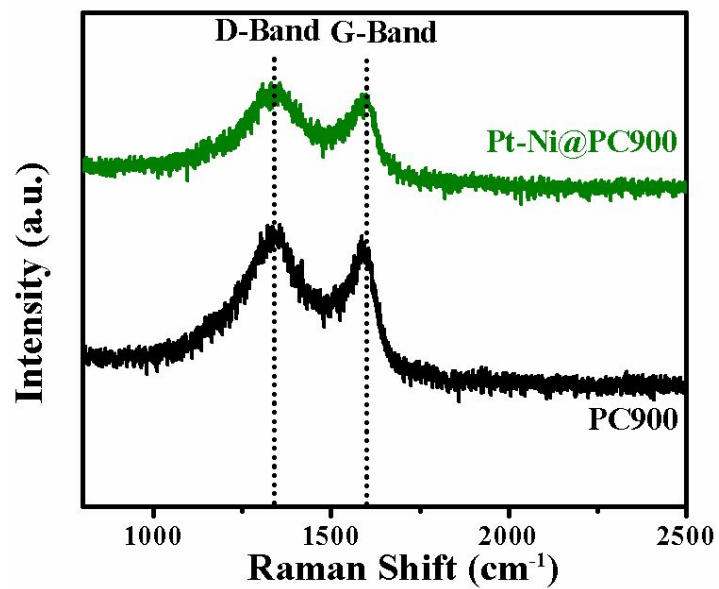

Figure S4. Raman spectra of PC900 and Pt-Ni@PC900.

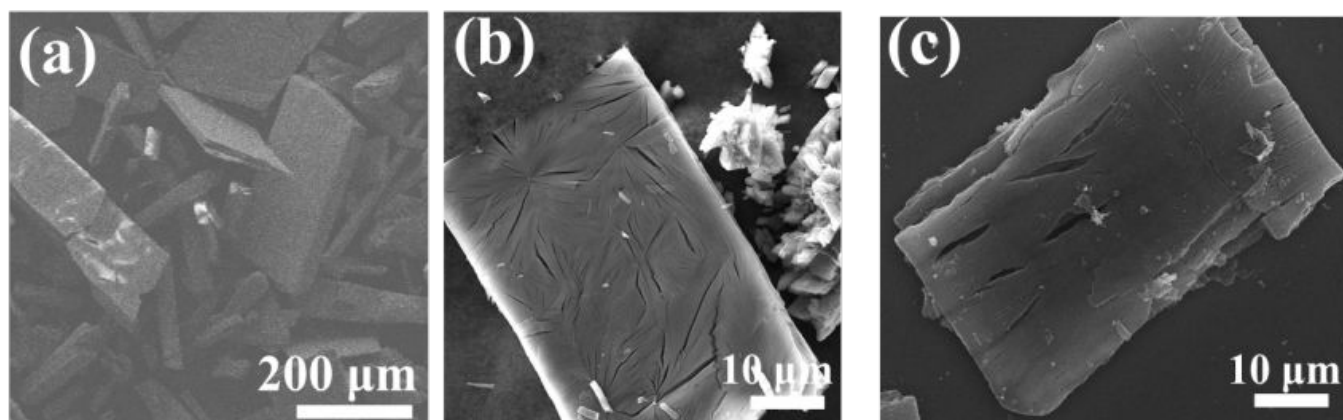

Figure S5. SEM images (a) Cd-MOF, (b) PC900 and (c) Pt-Ni@PC900.

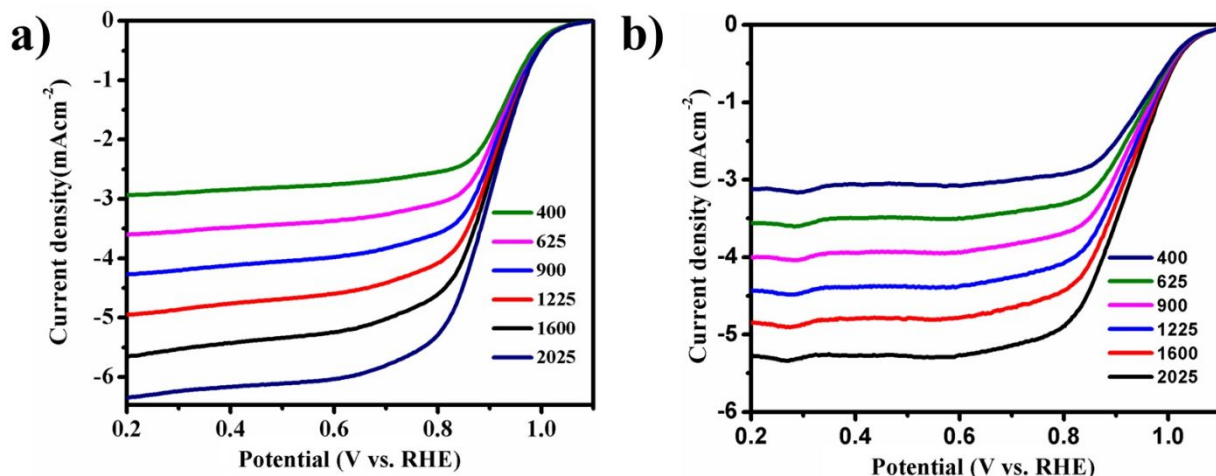

**Figure S6.** Results of LSV curves for ORR on RDE with varying speed of rotation from 400-2025 rpm in 0.1 M KOH at 5 mV s<sup>-1</sup> scan rate, (a) Pt-Ni@PC900 and (b) 20%Pt/C.

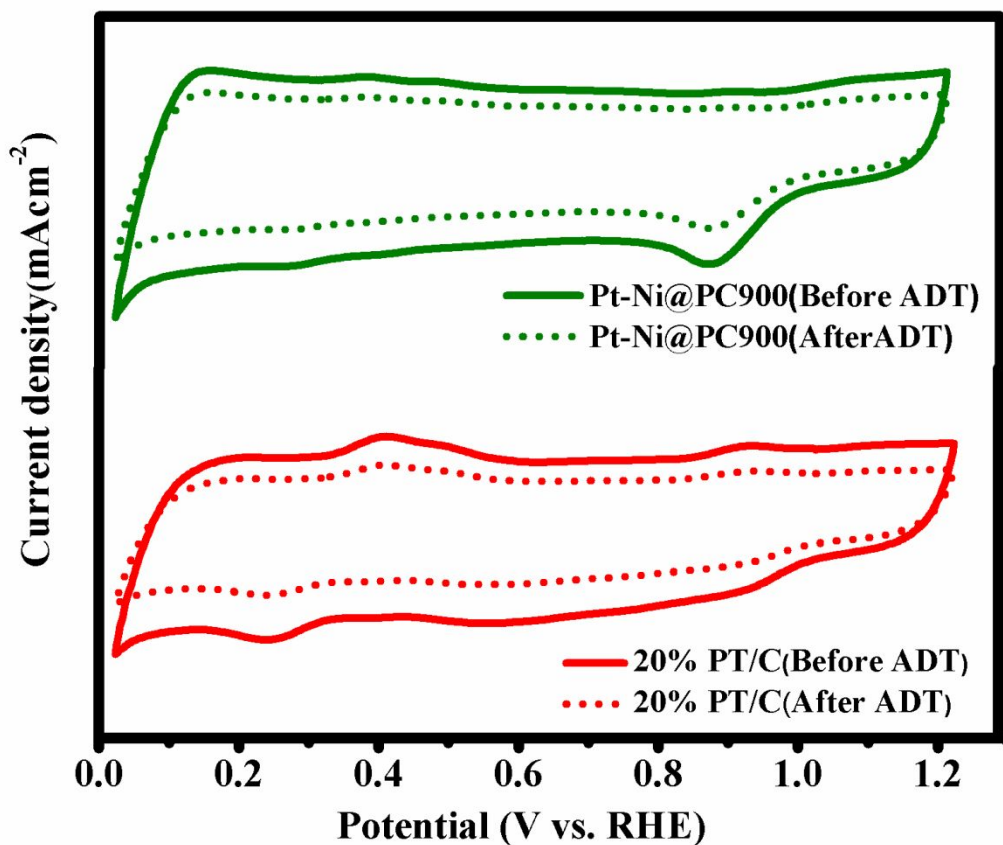

**Figure S7.** CV curves on RDE for Pt-Ni@PC900 and 20%Pt/C electrode (catalyst loading amount: 316  $\mu\text{g cm}^{-2}$ ) at 50 mV s<sup>-1</sup> in O<sub>2</sub>-saturated 0.1 M KOH (solid line represents before ADT and dotted line represents after ADT).



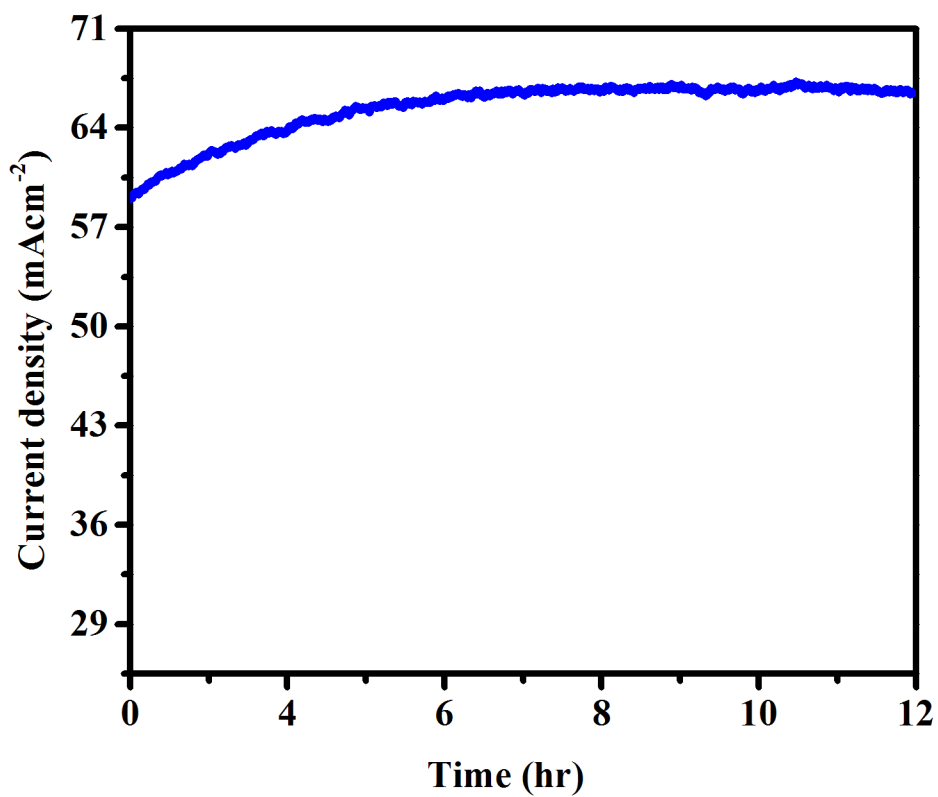

**Figure S8.** Durability test of Pt-Ni@PC900 in 1 M KOH solution (time-dependent current density curve under constant potential of 0.5 V versus Ag/AgCl).

**Table S1.** Crystal data and structure refinement details of  $[\text{C}_8\text{H}_{10}\text{CdO}_7]_n \cdot 4\text{H}_2\text{O}$ 

| Parameters                                | Cd-MOF                                                     |
|-------------------------------------------|------------------------------------------------------------|
| Empirical formula                         | $[\text{C}_8\text{H}_{18}\text{CdO}_{11}]$                 |
| Formula weight                            | 402.62                                                     |
| T (K)                                     | 130(2) K                                                   |
| Wavelength (Å)                            | 0.71073                                                    |
| Crystal system                            | Orthorhombic                                               |
| Space group                               | Pcca                                                       |
| a (Å)                                     | 7.2226(9)                                                  |
| b (Å)                                     | 9.9625(12)                                                 |
| c (Å)                                     | 19.800(2)                                                  |
| $\alpha$ (°)                              | 90                                                         |
| $\beta$ (°)                               | 90                                                         |
| $\gamma$ (°)                              | 90                                                         |
| Volume (Å <sup>3</sup> )                  | 1424.71(30)                                                |
| Z                                         | 4                                                          |
| D calc (Mg/m <sup>3</sup> )               | 1.877                                                      |
| Absorption coefficient(mm <sup>-1</sup> ) | 1.584                                                      |
| F(000)                                    | 808                                                        |
| Crystal size (mm <sup>3</sup> )           | 0.470x 0.100 x 0.090                                       |
| $\theta$ (°) range                        | 2.04 to 27.88                                              |
| Reflections collected                     | 7204                                                       |
| Limiting indices                          | $-9 \leq h \leq 8, -12 \leq k \leq 12, -24 \leq l \leq 21$ |
| R(int)                                    | 0.0339                                                     |
| Completeness to $\theta = 27.88^\circ$    | 99.90%                                                     |
| CCDC No.                                  | 1503652                                                    |

**Table S2.** Theoretical structural parameters of Cd-MOF at B3LYP/LANL2DZ level.

| Bond Lengths (Å)    |        |             |               |        |             |
|---------------------|--------|-------------|---------------|--------|-------------|
|                     | DFT    | EXP.        |               | DFT    | EXP.        |
| Cd1-O1              | 2.057  | 2.357       | Cd1-O9        | 2.050  | 2.250       |
| Cd1-O2              | 2.061  | 2.500       | Cd1-O10       | 2.045  | 2.250       |
| Cd1-O7              | 2.046  | 2.357       | Cd1-O11       | 2.041  | 2.236       |
| Cd1-O8              | 2.049  | 2.500       | -             | -      |             |
| Bond Angles (°)     |        |             |               |        |             |
|                     | DFT    | EXP.        |               | DFT    | EXP.        |
| O1-Cd1-O2           | 63.6   | 53.79       | O7-Cd1-O8     | 63.9   | 53.79       |
| O1-Cd1-O7           | 146.0  | 140.89      | O7-Cd1-O9     | 98.6   | 91.48       |
| O1-Cd1-O8           | 87.2   | 87.10       | O7-Cd1-O10    | 85.1   | 84.8        |
| O1-Cd1-O9           | 92.4   | 89.85       | O7-Cd1-O11    | 74.7   | 68.9        |
| O1-Cd1-O10          | 78.7   | 82.66       | O8-Cd1-O9     | 78.8   | 78.2        |
| O1-Cd1-O11          | 136.5  | 136.45      | O8-Cd1-O10    | 93.1   | 92.9        |
| O2-Cd1-O7           | 149.0  | 140.89      | O8-Cd1-O11    | 136.2  | 137.1       |
| O2-Cd1-O8           | 146.2  | 140.89      | O9-Cd1-O10    | 168.3  | 165.32      |
| O2-Cd1-O9           | 85.5   | 84.8        | O9-Cd1-O11    | 94.7   | 89.85       |
| O2-Cd1-O10          | 97.0   | 93.5        | O10-Cd1-O11   | 97.0   | 95.9        |
| O2-Cd1-O11          | 74.3   | 73.9        | -             | -      |             |
| Dihedral Angles (°) |        |             |               |        |             |
|                     | DFT    | EXP.        |               | DFT    | EXP.        |
| C7-O1-Cd1-O7        | 168.1  | 176.42(16)  | C16-O7-Cd1-O1 | 33.9   | -           |
| C7-O1-Cd1-O8        | -161.3 | -176.61(17) | C16-O8-Cd1-O2 | -169.1 | -176.61(17) |
| C7-O2-Cd1-O7        | -167.0 | -176.61(17) | C16-O7-Cd1-O1 | -160.9 | -176.61(17) |
| C7-O2-Cd1-O8        | 31.8   | -           | C16-O8-Cd1-O2 | 170.0  | 176.42(16)  |

**Table S3.** Reported experimental and their calculated harmonic frequencies (cm<sup>-1</sup>) at B3LYP/LANL2DZ level in vacuo for Cd-MOF.

| Assignments <sup>a</sup>                                                        | Frequencies  |            |
|---------------------------------------------------------------------------------|--------------|------------|
|                                                                                 | Experimental | Calculated |
| $\nu_{\text{OHasy}}^{\text{asymmetric}}$                                        | 3556         | 3750       |
| $\nu_{\text{OHsym}}^{\text{symmetric}}$                                         | 3474         | 3600       |
| $\nu_{\text{C=O}}, \alpha_{\text{O-H}}$                                         | 1639         | 1632       |
| $\nu_{\text{C=C}}$                                                              | 1616         | 1598       |
| $\nu_{\text{C-O}}, \nu_{\text{C-C}}, \gamma_{\text{C-H}}$                       | 1410         | 1430       |
| $\omega_{\text{O-H}}$                                                           | 883          | 882        |
| $\omega_{\text{O-H}}$                                                           | 736          | 702        |
| $\omega_{\text{O-H}}, \alpha_{\text{O-H}}, \nu_{\text{C-C}}, \nu_{\text{Cd-O}}$ | 621,481      | 643, 487   |

O

<sup>a</sup>  $\nu$ : stretching,  $\alpha$ : scissoring,  $\gamma$ : rocking,  $\omega$ : wagging

**Table S4.** Elemental analysis result for Pt-Ni@PC900 from XPS, CHNS/O and ICP-OES measurements.

| Elements | Atomic %<br>(XPS Analysis) | Atomic %<br>(CHNS/O Analysis) | Wt. %<br>(ICP-OES) |
|----------|----------------------------|-------------------------------|--------------------|
| C        | 80.94                      | 83.23                         | -                  |
| O        | 10.34                      | 12.38                         | -                  |
| Pt       | 5.8                        | -                             | 6.03               |
| Ni       | 2.92                       | -                             | 3.73               |

**Table S5.** Raman parameters calculated from Raman spectra of PC900 and Pt-Ni@PC900.

|             | G-Band | I <sub>G</sub> | D-Band | I <sub>D</sub> | R=I <sub>D</sub> /I <sub>G</sub> |
|-------------|--------|----------------|--------|----------------|----------------------------------|
| PC900       | 1584   | 21.2           | 1339   | 22.3           | 1.052                            |
| Pt-Ni@PC900 | 1600   | 15.3           | 1342   | 15.8           | 1.027                            |

**Table S6.** Textural parameters of [C<sub>8</sub>H<sub>10</sub>CdO<sub>7</sub>]<sub>n</sub>.4H<sub>2</sub>O, PC900 and Pt-Ni@PC900 obtained from the N<sub>2</sub> adsorption-desorption isotherms.

|             | Specific surface area<br>(m <sup>2</sup> g <sup>-1</sup> ) | Pore volume<br>(cm <sup>3</sup> g <sup>-1</sup> ) | Mean pore size<br>(nm) |
|-------------|------------------------------------------------------------|---------------------------------------------------|------------------------|
| PC900       | 877.01                                                     | 1.13                                              | 5.1                    |
| Pt-Ni@PC900 | 359.49                                                     | 0.43                                              | 3.5                    |

## References

- [1] R. Dennington, T. Keith, J. Millam, GaussView, version 5, Semichem Inc., Shawnee Mission, KS, (2009).
- [2] M. Frisch, G. Trucks, H. Schlegel, G. Scuseria, M. Robb, J. Cheeseman, G. Scalmani, V. Barone, B. Mennucci, G. Petersson, 09, Revision D. 01, Gaussian, Inc., Wallingford, CT, (2009).
- [3] X. Xu, W.A. Goddard, The X3LYP extended density functional for accurate descriptions of nonbond interactions, spin states, and thermochemical properties, *Proceedings of the National Academy of Sciences of the United States of America*, 101 (2004) 2673-2677.
- [4] C. Lee, W. Yang, R.G. Parr, Development of the Colle-Salvetti correlation-energy formula into a functional of the electron density, *Phys. Rev. B*, 37 (1988) 785.
- [5] K. Sayin, N. Kurtoglu, M. Kose, D. Karakas, M. Kurtoglu, Computational and experimental studies of 2-[(E)-hydrazinylidenemethyl]-6-methoxy-4-[(E)-phenyldiazenyl] phenol and its tautomers, *J. Mol. Struct.*, 1119 (2016) 413-422.
- [6] H. Keypour, M. Shayesteh, M. Rezaeivala, K. Sayin, Dinuclear Cu (II) complexes of compartmental Schiff base ligands formed from unsymmetrical tripodal amines of varying arm lengths: Crystal structure of  $[Cu_2L_1](ClO_4)_2$  and theoretical studies, *J. Mol. Struct.*, 1112 (2016) 110-118.
- [7] G.M. Sheldrick, A short history of SHELX, *Acta Crystallogr. Sect. A: Found. Crystallogr.*, 64 (2007) 112-122.
- [8] M. Nadeem, M.H. Bhatti, K. Sayin, U. Yunus, M. Mehmood, S. Mehboob, U. Flörke, Crystal structure, thermal, luminescent and terahertz time domain spectroscopy of magnesium N-phthaloyl- $\beta$ -alaninate: A combined experimental and theoretical study, *J. Mol. Struct.*, (2018).
- [9] S. Mehboob, M. Mehmood, M. Ahmed, J. Ahmad, M.T. Tanvir, I. Ahmad, Terahertz time domain spectroscopy of hydrothermally synthesized boehmite and ammonium dawsonite nanostructures, *Infrared Phys. Technol.*, 78 (2016) 200-208.
